# Supplementary material
Source: publisher figshare collection journal article supplement (https://future-science-group.figshare.com/ndownloader/files/28827618)

**Supplementary Figure S1. Binding pattern of deferasirox with ADRP**. **(A)** Surface view of ADRP**-**Exjade complex. (B) Residue interaction diagram of Exjade with ADRP. (C) 2D interaction diagram of ADRP-Exjade interaction.

**
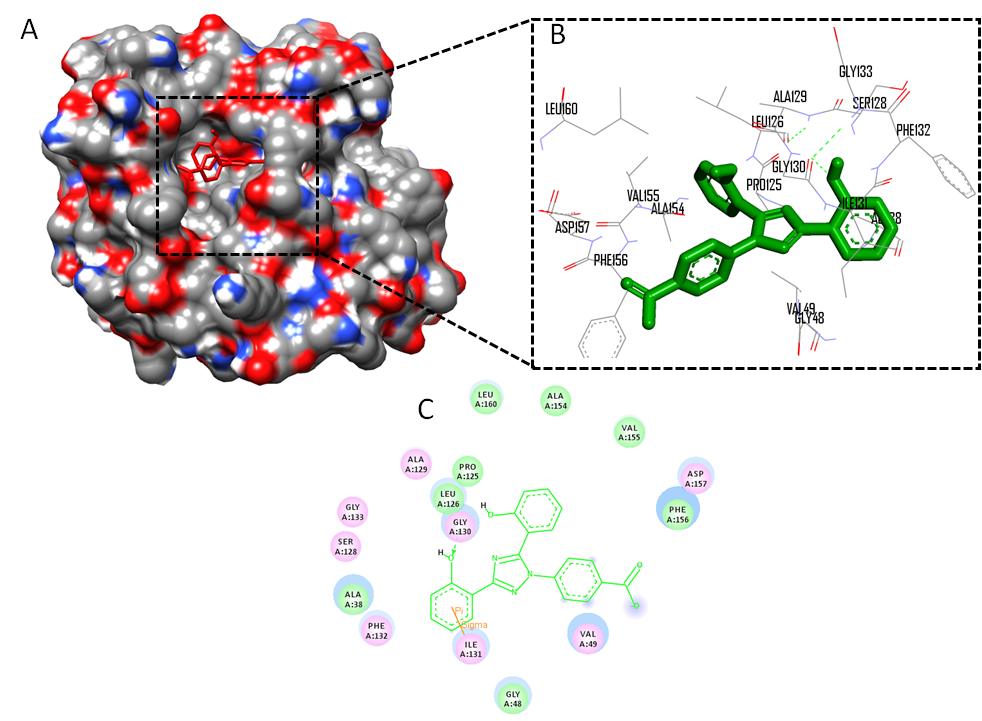
**

**Supplementary Figure S2. Binding pattern of droperidol with ADRP**. **(A)** Surface view of ADRP**-**Inapsine complex. (B) Residue interaction diagram of Inapsine with ADRP. (C) 2D interaction diagram of ADRP-Inapsine interaction.


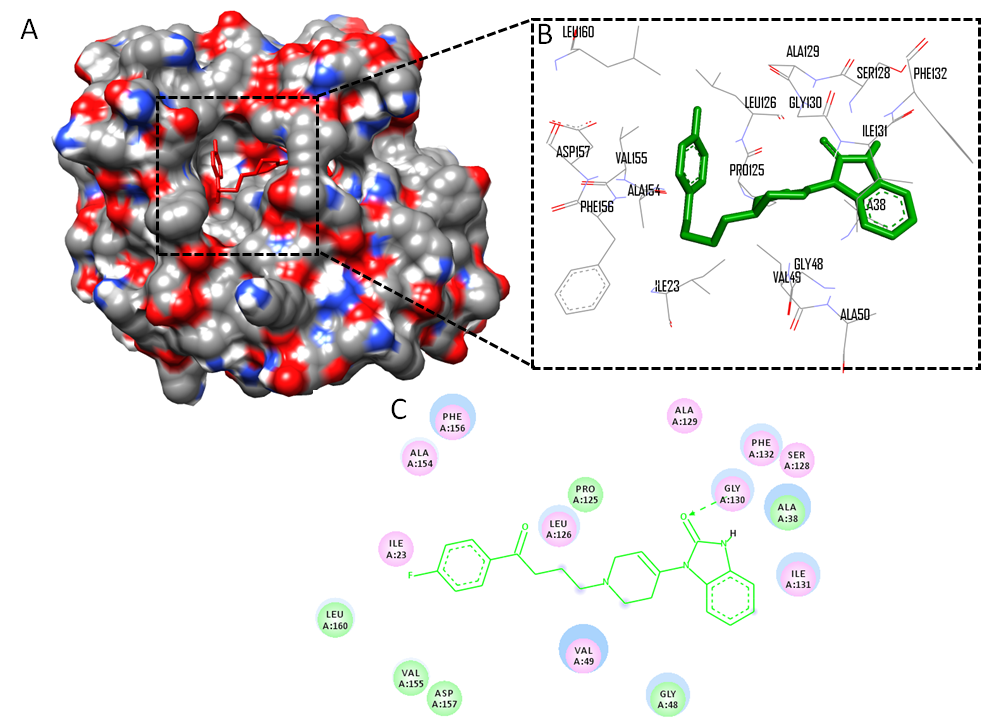

Supplement: Supplementary file 1 [file 28827618]
